# Supplementary material
Source: ML conference proceedings conference paper supplement (https://openaccess.thecvf.com/content/CVPR2023/html/Fang_EVA_Exploring_the_CVPR_2023_paper.html)
Supplement: Supplementary file 1 [file Fang_EVA_Exploring_the_CVPR_2023_supplemental.pdf]

# Supplemental Material of

## EVA: Exploring the Limits of Masked Visual Representation Learning at Scale

Yuxin Fang<sup>1,2†</sup>   Wen Wang<sup>3,2†</sup>   Binhui Xie<sup>4,2†</sup>   Quan Sun<sup>2</sup>   Ledell Wu<sup>2</sup>  
 Xinggang Wang<sup>1‡</sup>   Tiejun Huang<sup>2</sup>   Xinlong Wang<sup>2‡</sup>   Yue Cao<sup>2‡</sup>

<sup>1</sup>Huazhong University of Science and Technology

<sup>2</sup>Beijing Academy of Artificial Intelligence

<sup>3</sup>Zhejiang University

<sup>4</sup>Beijing Institute of Technology

Code & Models: [baaivision/EVA/01](https://github.com/baaivision/EVA/01)

| config                     | value                                          |
|----------------------------|------------------------------------------------|
| peak learning rate         | 1e-4                                           |
| optimizer                  | AdamW [13, 15]                                 |
| optimizer hyper-parameters | $\beta_1, \beta_2, \epsilon = 0.9, 0.98, 1e-6$ |
| layer-wise lr decay [1, 6] | 0.85                                           |
| learning rate schedule     | cosine decay                                   |
| weight decay               | 0.05                                           |
| input resolution           | 224 <sup>2</sup>                               |
| batch size                 | 4096                                           |
| warmup epochs              | 15                                             |
| training epochs            | 60                                             |
| drop path [11]             | 0.4                                            |
| augmentation               | RandAug (9, 0.5) [7]                           |
| label smoothing [17]       | 0.1                                            |
| cutmix [21]                | 1.0                                            |
| mixup [22]                 | ✗                                              |
| random erasing [23]        | ✗                                              |
| random resized crop        | (0.5, 1)                                       |
| ema                        | ✗                                              |

Table 1. Intermediate fine-tuning setting for ImageNet-21K.

| config                     | value                                           |
|----------------------------|-------------------------------------------------|
| peak learning rate         | 3e-5                                            |
| optimizer                  | AdamW                                           |
| optimizer hyper-parameters | $\beta_1, \beta_2, \epsilon = 0.9, 0.999, 1e-8$ |
| layer-wise lr decay        | 0.95                                            |
| learning rate schedule     | cosine decay                                    |
| weight decay               | 0.05                                            |
| input resolution           | 336 <sup>2</sup> / 560 <sup>2</sup>             |
| batch size                 | 512                                             |
| warmup epochs              | 2                                               |
| training epochs            | 10 / 15                                         |
| drop path                  | 0.4                                             |
| augmentation               | RandAug (9, 0.5)                                |
| label smoothing            | 0.3                                             |
| cutmix                     | ✗                                               |
| mixup                      | ✗                                               |
| random erasing             | ✗                                               |
| random resized crop        | (0.08, 1)                                       |
| ema                        | 0.9999                                          |
| test crop ratio            | 1.0                                             |

Table 2. Fine-tuning setting for ImageNet-1K.

## A. Appendix

The MIM pre-training and contrastive language-image pre-training settings are already available in our main submission. Here we summarize the detailed configurations for image classification (§A.1), video action classification (§A.2), object detection & instance segmentation (§A.3), and semantic segmentation (§A.4).

### A.1. Image Classification

The fine-tuning hyper-parameters for ImageNet-21K and ImageNet-1K are shown in Table 1 and Table 2, respectively.

### A.2. Video Action Classification

For video action classification tasks, a two-stage fine-tuning process is adopted. The statistics of video datasets

| dataset & split         | #clips  | avg. length | #classes |
|-------------------------|---------|-------------|----------|
| Kinetics-400 train [12] | 234,584 | 10s         | 400      |
| Kinetics-400 val [12]   | 19,760  | 10s         | 400      |
| Kinetics-600 train [2]  | 412,688 | 10s         | 600      |
| Kinetics-600 val [2]    | 29,779  | 10s         | 600      |
| Kinetics-700 train [3]  | 534,063 | 10s         | 700      |
| Kinetics-700 val [3]    | 33,914  | 10s         | 700      |
| Kinetics-722 (ours)     | 629,395 | 10s         | 722      |

Table 3. Video dataset statistics.

we used are available in Table 3.

In the first stage, we conduct intermediate fine-tuning on a merged dataset coined Kinetics-722 (K-722) that integrates all valid training samples from Kinetics-400 (K-400) [12], Kinetics-600 (K-600) [2] and Kinetics-700 (K-700) [3]. The input video resolution is 224<sup>2</sup> with 8 frames. Notably, for a fair and legal comparison, we removed leaked videos in all validation sets and duplicated videos in all training sets based on the videos’ “youtube id”. Accordingly, the cleaned K-722 contains 0.63M training videos, covering 722 human

<sup>†</sup>Interns at Beijing Academy of Artificial Intelligence (BAAI).

<sup>‡</sup>Corresponding authors: Yue Cao ([caoyue10@gmail.com](mailto:caoyue10@gmail.com)), Xinlong Wang ([xinlong.wang96@gmail.com](mailto:xinlong.wang96@gmail.com)) and Xinggang Wang ([xgwang@hust.edu.cn](mailto:xgwang@hust.edu.cn)).

| config                     | value                                          |
|----------------------------|------------------------------------------------|
| optimizer                  | AdamW                                          |
| optimizer hyper-parameters | $\beta_1, \beta_2, \epsilon = 0.9, 0.98, 1e-6$ |
| weight decay               | 0.05                                           |
| peak learning rate         | 8e-6                                           |
| learning rate schedule     | cosine decay                                   |
| warmup epochs              | 5                                              |
| epochs                     | 40                                             |
| batch size                 | 256                                            |
| input resolution           | $224^2$                                        |
| random flip                | 0.5                                            |
| multiscale crop            | (1, 0.875, 0.75, 0.66)                         |
| color jitter               | 0.8                                            |
| grayscale                  | 0.2                                            |
| cutmix                     | 1.0                                            |
| mixup                      | 0.8                                            |
| label smoothing            | 0.1                                            |
| drop path                  | 0.3                                            |
| layer-wise lr decay        | $\times$                                       |

Table 4. Kinetics-722 intermediate fine-tuning settings.

| config                     | K-400 [12]                                     | K-600 [2] | K-700 [3] |
|----------------------------|------------------------------------------------|-----------|-----------|
| optimizer                  | AdamW                                          |           |           |
| optimizer hyper-parameters | $\beta_1, \beta_2, \epsilon = 0.9, 0.98, 1e-6$ |           |           |
| weight decay               | 0.05                                           |           |           |
| peak learning rate         | 1e-6                                           |           |           |
| minimal learning rate      | 1e-6                                           |           |           |
| warmup epochs              | 0                                              |           |           |
| epochs                     | 1                                              | 2         | 2         |
| batch size                 | 256                                            |           |           |
| input resolution           | $224^2$                                        |           |           |
| random flip                | 0.5                                            |           |           |
| multiscale crop            | (1, 0.875, 0.75, 0.66)                         |           |           |
| color jitter               | 0.8                                            |           |           |
| grayscale                  | 0.2                                            |           |           |
| mixup                      | $\times$                                       |           |           |
| cutmix                     | $\times$                                       |           |           |
| label smoothing            | 0.1                                            |           |           |
| drop path                  | 0.2                                            |           |           |
| layer-wise lr decay        | 0.95                                           |           |           |
| multi-view inference       | 4 clips, 3 crops                               |           |           |

Table 5. Hyper-parameters used in the video action recognition.

action classes. Table 4 lists the detailed settings & hyper-parameters for fine-tuning on this dataset.

In the second stage, we further fine-tune on each dataset using more input video frames of 16 with a resolution of  $224^2$ . For the frame sampling, we adopt the sparse sampling strategy [19]. During testing, we follow the common practice of multi-view inference [8, 14, 18, 20] with 4 temporal clips and 3 spatial crops. The final prediction is the ensemble of all trials. Table 5 lists the detailed hyper-parameters for fine-tuning on K-400, K-600 and K-700.

### A.3. Object Detection & Instance Segmentation

The detailed hyper-parameters are shown in Table 6 and Table 7. For intermediate fine-tuning on Objects365 [16], the model is trained with a batch size of 128 for 380k iterations. To accelerate the training process, we use a smaller input resolution of  $1024^2$  for the first 320k iteration. Afterward, the input resolution is lifted to  $1280^2$  for a better adaptation

| config                     | value                                           |
|----------------------------|-------------------------------------------------|
| optimizer                  | AdamW                                           |
| optimizer hyper-parameters | $\beta_1, \beta_2, \epsilon = 0.9, 0.999, 1e-8$ |
| learning rate              | 1e-4                                            |
| layer-wise lr decay        | 0.9                                             |
| training steps             | 380k                                            |
| training input resolution  | $1024^2 \rightarrow 1280^2$                     |
| batch size                 | 128                                             |
| weight decay               | 0.1                                             |
| drop path                  | 0.6                                             |

Table 6. Objects365 object detection intermediate fine-tuning settings.

| config                     | COCO                                            | LVIS  |
|----------------------------|-------------------------------------------------|-------|
| optimizer                  | AdamW                                           |       |
| optimizer hyper-parameters | $\beta_1, \beta_2, \epsilon = 0.9, 0.999, 1e-8$ |       |
| learning rate              | 2.5e-5                                          |       |
| learning rate schedule     | step decay                                      |       |
| training steps             | 45k                                             | 75k   |
| learning decay step        | 40k                                             | 70k   |
| batch size                 | 64                                              |       |
| training input resolution  | $1280^2$                                        |       |
| weight decay               | 0.1                                             |       |
| layer-wise lr decay        | 0.9                                             |       |
| drop path                  | 0.6                                             |       |
| repeat threshold           | -                                               | 0.001 |
| frequency weight power     | -                                               | 0.5   |
| max numbers of detection   | 100                                             | 1000  |

Table 7. COCO and LVIS object detection & instance segmentation fine-tuning settings.

| config                     | COCO-Stuff                                      | ADE20K |
|----------------------------|-------------------------------------------------|--------|
| optimizer                  | AdamW                                           |        |
| optimizer hyper-parameters | $\beta_1, \beta_2, \epsilon = 0.9, 0.999, 1e-8$ |        |
| peak learning rate         | 1.5e-5                                          | 2.5e-5 |
| batch size                 | 32                                              | 64     |
| fine-tuning steps          | 60000                                           | 20000  |
| layer-wise lr decay        | 0.95                                            |        |
| weight decay               | 0.5                                             |        |
| drop path                  | 0.5                                             |        |
| input resolution           | $896^2$                                         |        |
| seg head #enc. & #dec.     | 6 & 8                                           |        |
| seg head dim               | 1024                                            |        |
| relative position bias     | $\times$                                        |        |

Table 8. COCO-Stuff-164K and ADE20K semantic segmentation fine-tuning settings.

to the fine-tuning of COCO and LVIS.

For fine-tuning COCO and LVIS, the learning rate is initialized as 2.5e-5 and step by a factor of 10 for the last 5k iterations. As shown in Table 7, we use almost identical hyper-parameters for training COCO and LVIS. Except for the commonly used repeat factor sampling [10] and federated loss [24] that are specialized for long-tailed recognition, the only difference in training is that we train the model for 45k steps on COCO, while a longer 75k step on LVIS, since the tail classes generally take a longer schedule to converge [9].

## A.4. Semantic Segmentation

Detailed configurations about semantic segmentation are available in Table 8. Our settings basically follow ViT-Adapter [4] with Mask2Former [5] as the segmentation head. For ADE20K, we use COCO-Stuff pre-trained weights as initialization.

## References

- [1] Hangbo Bao, Li Dong, and Furu Wei. Beit: Bert pre-training of image transformers. *arXiv preprint arXiv:2106.08254*, 2021. 1
- [2] Joao Carreira, Eric Noland, Andras Banki-Horvath, Chloe Hillier, and Andrew Zisserman. A short note about kinetics-600. *arXiv preprint arXiv:1808.01340*, 2018. 1, 2
- [3] Joao Carreira, Eric Noland, Chloe Hillier, and Andrew Zisserman. A short note on the kinetics-700 human action dataset. *arXiv preprint arXiv:1907.06987*, 2019. 1, 2
- [4] Zhe Chen, Yuchen Duan, Wenhai Wang, Junjun He, Tong Lu, Jifeng Dai, and Yu Qiao. Vision transformer adapter for dense predictions. *arXiv preprint arXiv:2205.08534*, 2022. 3
- [5] Bowen Cheng, Ishan Misra, Alexander G Schwing, Alexander Kirillov, and Rohit Girdhar. Masked-attention mask transformer for universal image segmentation. *arXiv preprint arXiv:2112.01527*, 2021. 3
- [6] Kevin Clark, Minh-Thang Luong, Quoc V Le, and Christopher D Manning. ELECTRA: Pre-training text encoders as discriminators rather than generators. *arXiv preprint arXiv:2003.10555*, 2020. 1
- [7] Ekin D Cubuk, Barret Zoph, Jonathon Shlens, and Quoc V Le. Randaugment: Practical automated data augmentation with a reduced search space. In *CVPRW*, 2020. 1
- [8] Christoph Feichtenhofer, Haoqi Fan, Yanghao Li, and Kaiming He. Masked autoencoders as spatiotemporal learners. *arXiv preprint arXiv:2205.09113*, 2022. 2
- [9] WeiFu Fu, CongChong Nie, Ting Sun, Jun Liu, TianLiang Zhang, and Yong Liu. Lvis challenge track technical report 1st place solution: Distribution balanced and boundary refinement for large vocabulary instance segmentation. *arXiv preprint arXiv:2111.02668*, 2021. 2
- [10] Agrim Gupta, Piotr Dollar, and Ross Girshick. Lvis: A dataset for large vocabulary instance segmentation. In *CVPR*, 2019. 2
- [11] Gao Huang, Yu Sun, Zhuang Liu, Daniel Sedra, and Kilian Q Weinberger. Deep networks with stochastic depth. In *ECCV*, 2016. 1
- [12] Will Kay, Joao Carreira, Karen Simonyan, Brian Zhang, Chloe Hillier, Sudheendra Vijayanarasimhan, Fabio Viola, Tim Green, Trevor Back, Paul Natsev, et al. The kinetics human action video dataset. *arXiv preprint arXiv:1705.06950*, 2017. 1, 2
- [13] Diederik P Kingma and Jimmy Ba. Adam: A method for stochastic optimization. *arXiv preprint arXiv:1412.6980*, 2014. 1
- [14] Ze Liu, Jia Ning, Yue Cao, Yixuan Wei, Zheng Zhang, Stephen Lin, and Han Hu. Video swin transformer. In *CVPR*, 2022. 2
- [15] Ilya Loshchilov and Frank Hutter. Decoupled weight decay regularization. In *ICLR*, 2019. 1
- [16] Shuai Shao, Zeming Li, Tianyuan Zhang, Chao Peng, Gang Yu, Xiangyu Zhang, Jing Li, and Jian Sun. Objects365: A large-scale, high-quality dataset for object detection. In *ICCV*, 2019. 2
- [17] Christian Szegedy, Vincent Vanhoucke, Sergey Ioffe, Jon Shlens, and Zbigniew Wojna. Rethinking the inception architecture for computer vision. In *CVPR*, 2016. 1
- [18] Zhan Tong, Yibing Song, Jue Wang, and Limin Wang. Videomae: Masked autoencoders are data-efficient learners for self-supervised video pre-training. *arXiv preprint arXiv:2203.12602*, 2022. 2
- [19] Limin Wang, Yuanjun Xiong, Zhe Wang, Yu Qiao, Dahua Lin, Xiaoou Tang, and Luc Van Gool. Temporal segment networks: Towards good practices for deep action recognition. In *ECCV*, 2016. 2
- [20] Chen Wei, Haoqi Fan, Saining Xie, Chao-Yuan Wu, Alan Yuille, and Christoph Feichtenhofer. Masked feature prediction for self-supervised visual pre-training. In *CVPR*, 2022. 2
- [21] Sangdoon Yun, Dongyoon Han, Seong Joon Oh, Sanghyuk Chun, Junsuk Choe, and Youngjoon Yoo. Cutmix: Regularization strategy to train strong classifiers with localizable features. In *ICCV*, 2019. 1
- [22] Hongyi Zhang, Moustapha Cisse, Yann N Dauphin, and David Lopez-Paz. mixup: Beyond empirical risk minimization. *arXiv preprint arXiv:1710.09412*, 2017. 1
- [23] Zhun Zhong, Liang Zheng, Guoliang Kang, Shaozi Li, and Yi Yang. Random erasing data augmentation. In *AAAI*, 2020. 1
- [24] Xingyi Zhou, Vladlen Koltun, and Philipp Krähenbühl. Probabilistic two-stage detection. *arXiv preprint arXiv:2103.07461*, 2021. 2
